# Supplementary material for: Crystal structure, Hirshfeld surface analysis, conduction mechanism and electrical modulus study of the new organic–inorganic compound [C8H10NO]2HgBr4
Source: Royal Society of Chemistry journal article supplement (doi:10.1039/d4ra00689e), 2024-01-01
Supplement: d4ra00689e1.pdf [file d4ra00689e1.pdf]

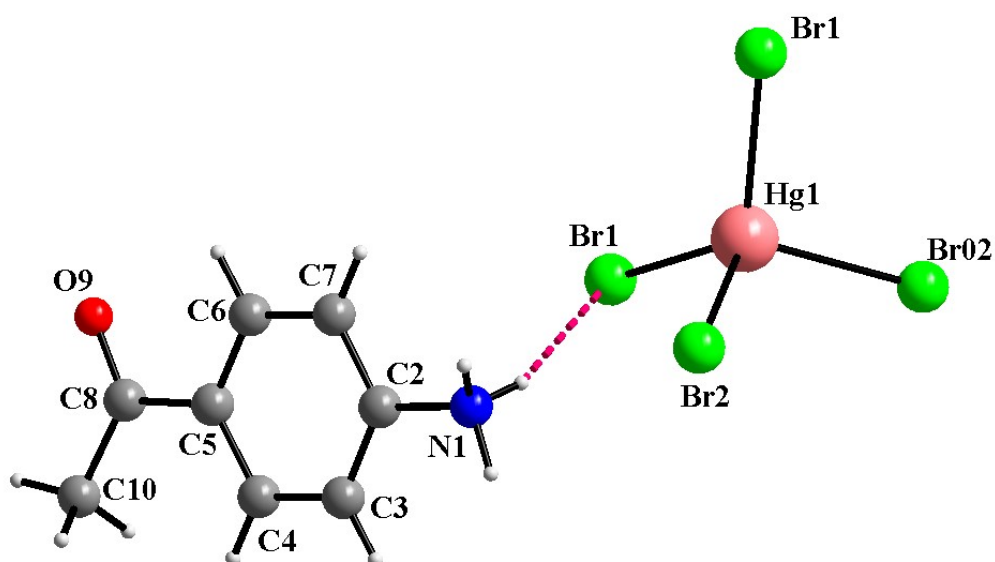

Figure S1: The asymmetric unit of  $[\text{C}_8\text{H}_{10}\text{NO}]_2\text{HgBr}_4$  compound (expanded by symmetry to give complete metallic tetrahedron). Hydrogen bonds are represented by dashed lines.

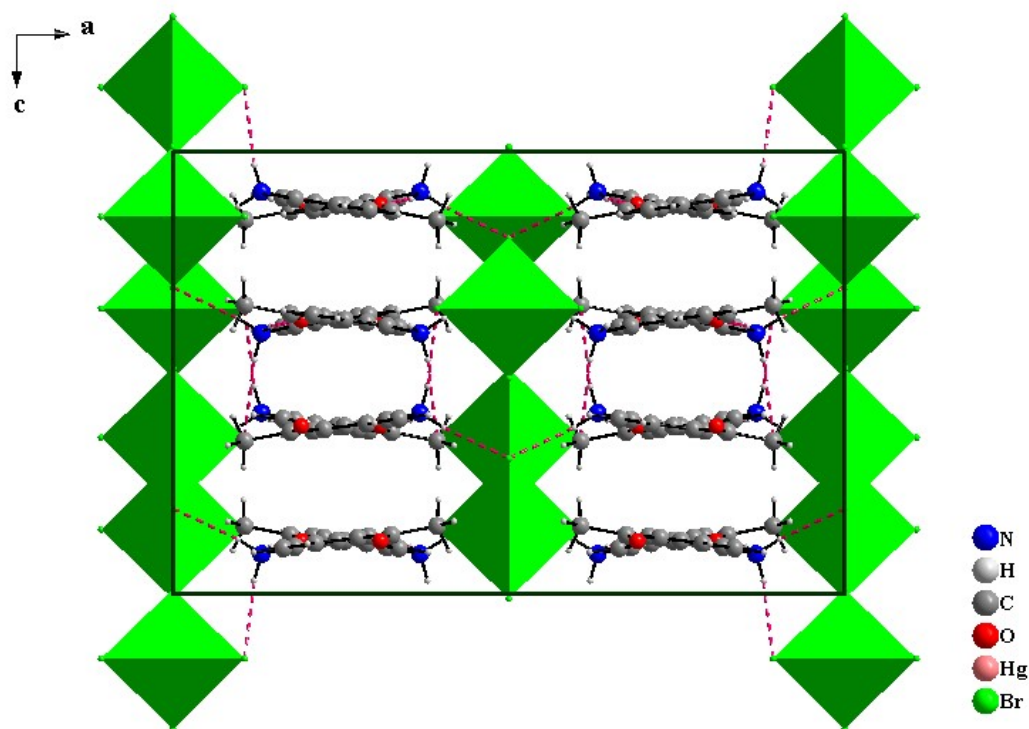

Figure S2:  $[010]$  view showing alternation of organic and inorganic sheets in  $[\text{C}_8\text{H}_{10}\text{NO}]_2\text{HgBr}_4$  sample.

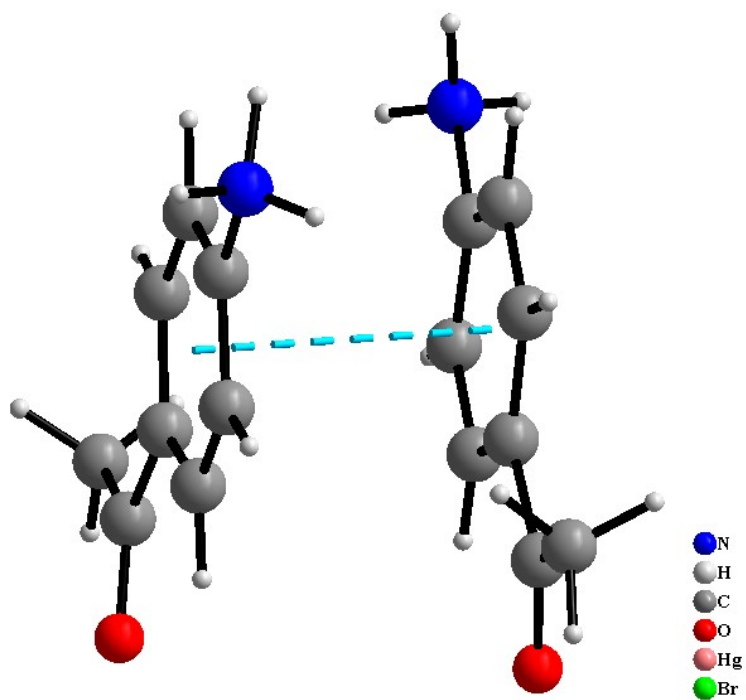

Figure S3:  $\pi$ - $\pi$  interactions between the organic cations in the  $[C_8H_{10}NO]_2HgBr_4$  compound.

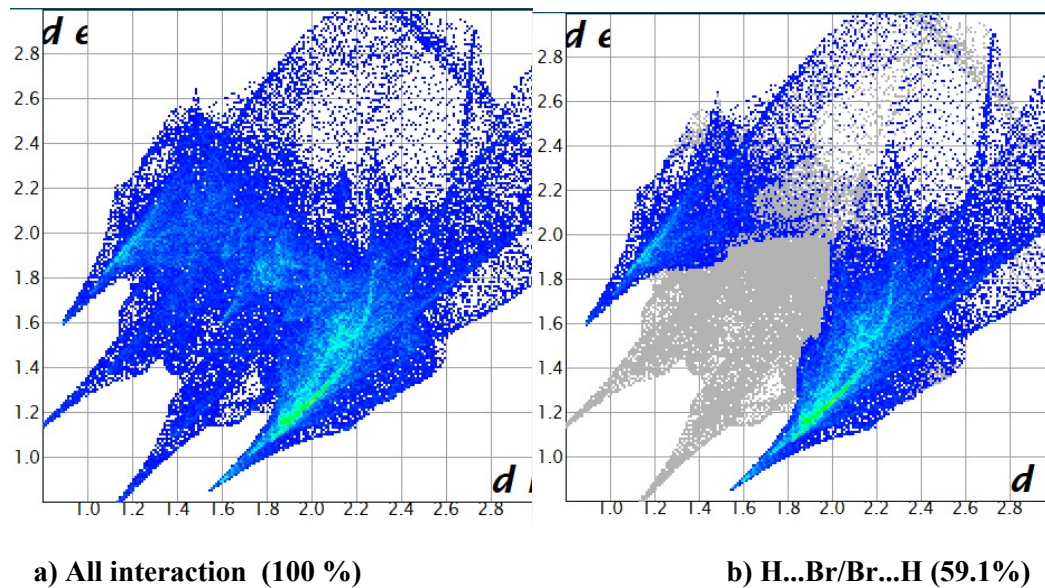

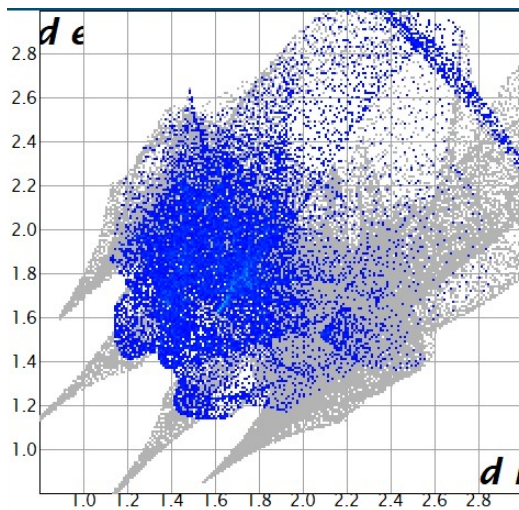

**e) H...H/H...H (17.7%)**

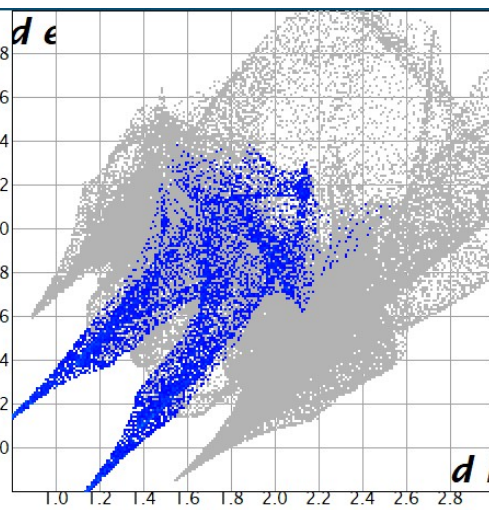

**d) O...H/H...O (7.9%)**

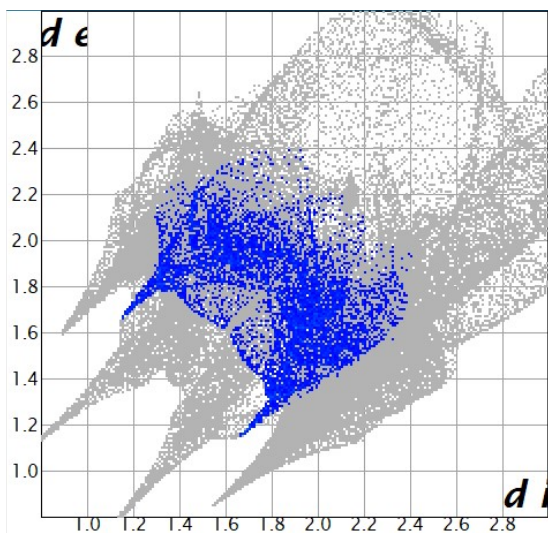

**e) C...H/H...C (7.4%)**

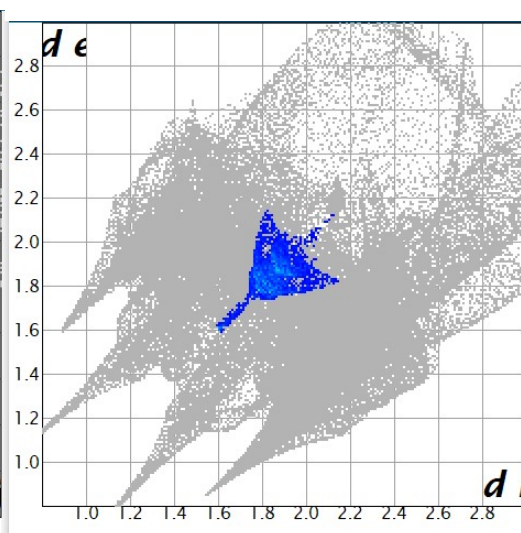

**f) C...C/C...C (3.3%)**

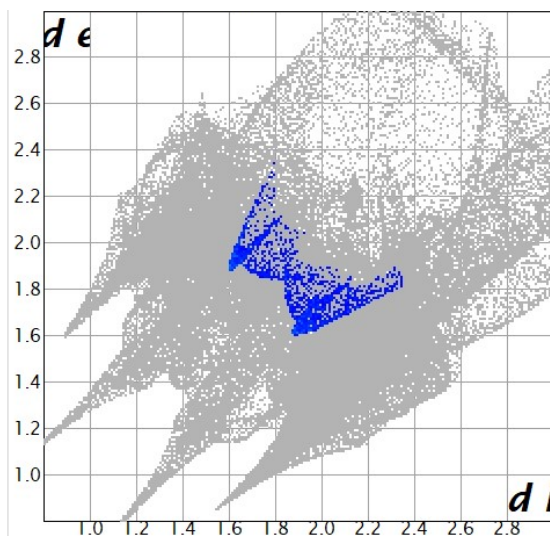

**g) C...O/O...C (1.7%)**

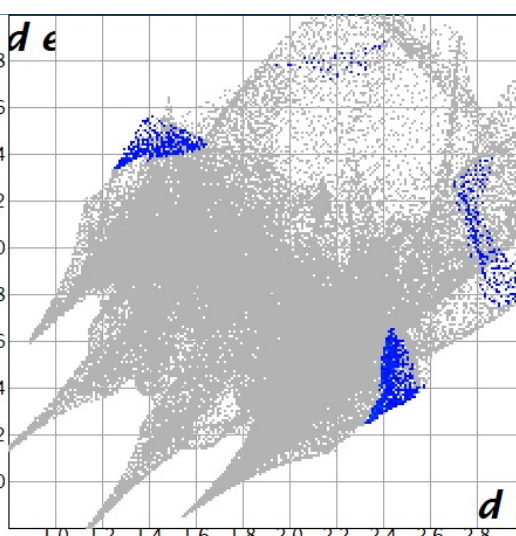

**h) H...Hg/Hg...H (1.5%)**

Figure S4 : The two-dimensional fingerprint plot for  $[C_8H_{10}NO]_2HgBr_4$  showing contributions from different contacts a): all contacts, b):  $H\cdots Br/Br\cdots H$ , c):  $H\cdots H$ , d):  $O\cdots H/H\cdots O$ , e):  $C\cdots H/H\cdots C$ , f):  $C\cdots C$ , g):  $C\cdots O/O\cdots C$ , h):  $H\cdots Hg/Hg\cdots H$

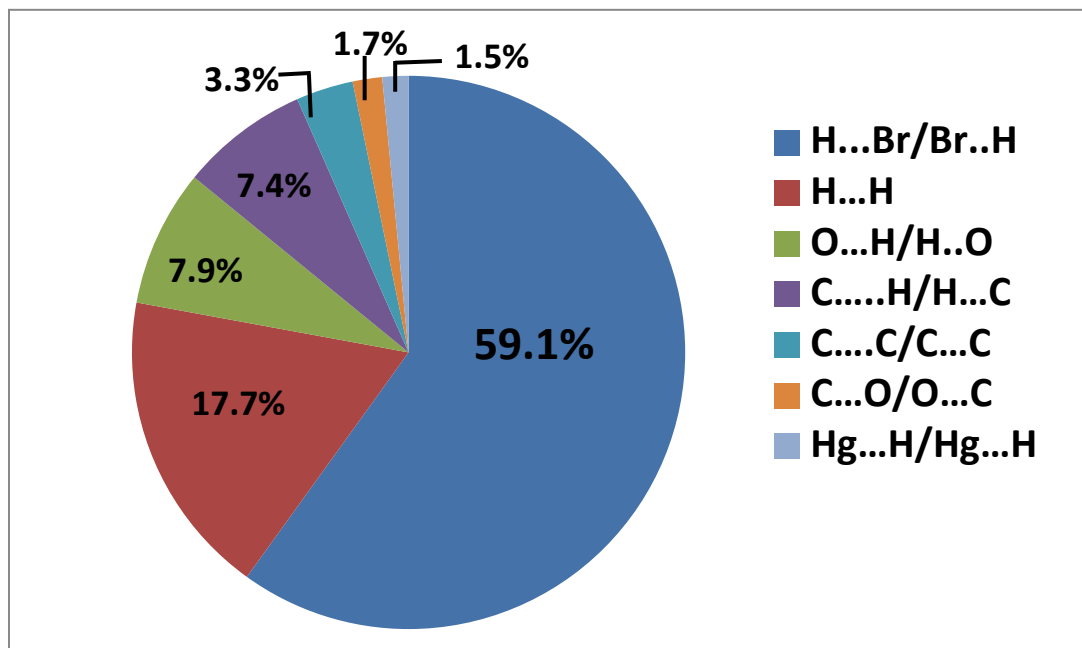

Figure S5: Relative contributions to the Hirshfeld surface areas for the various intermolecular contact

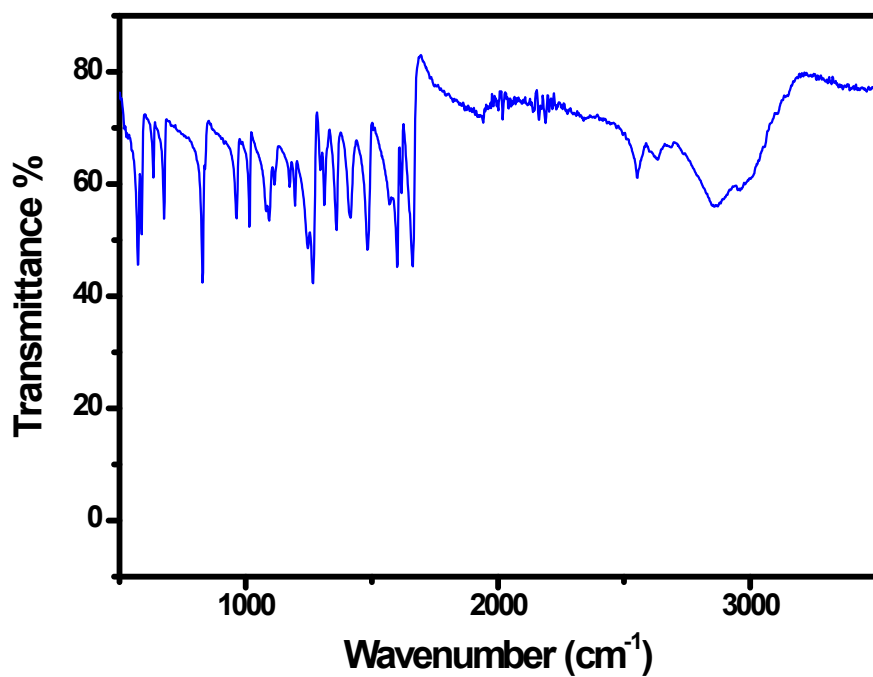

Figure S6: FT-IR spectrum of [C<sub>8</sub>H<sub>10</sub>NO]<sub>2</sub>HgBr<sub>4</sub> compound measured at room temperature

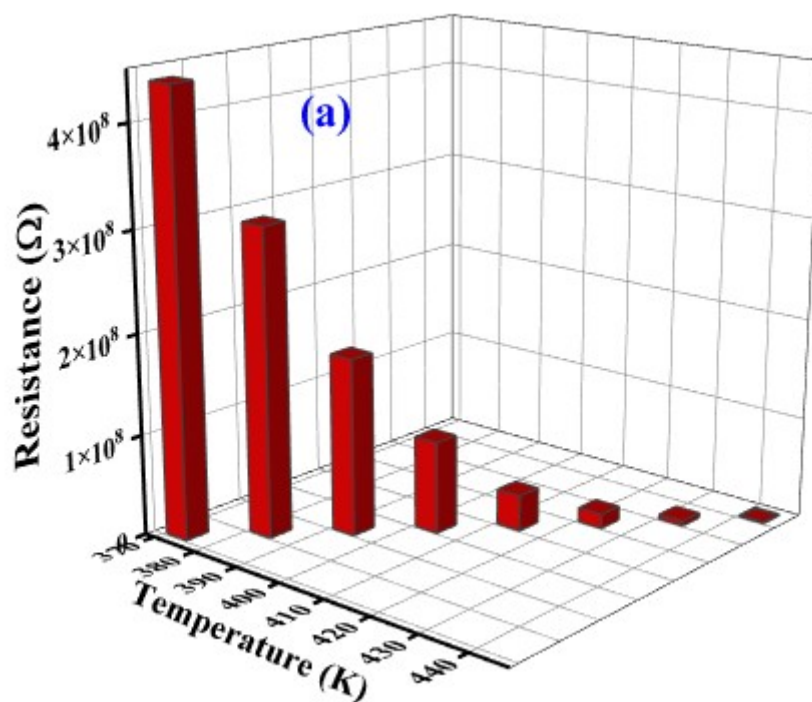

Figure S7: (a) the variation Resistance of [C<sub>8</sub>H<sub>10</sub>NO]<sub>2</sub>HgBr<sub>4</sub> at different temperatures.

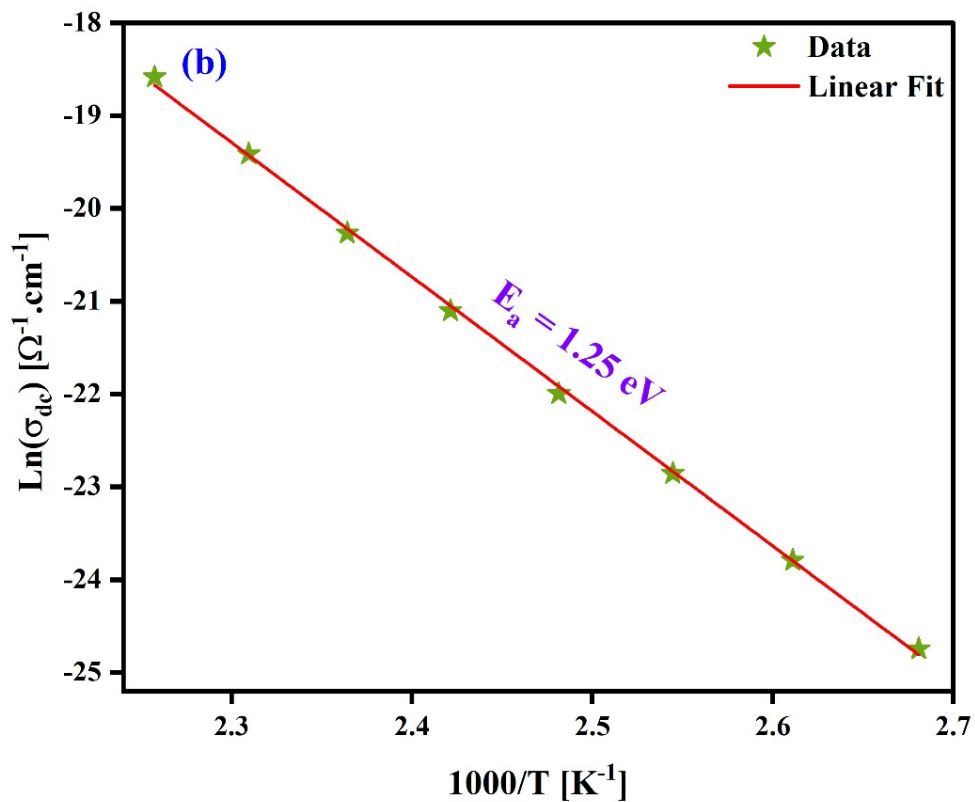

Figure S7 : (b) Arrhenius plots of dc conductivity for  $[\text{C}_8\text{H}_{10}\text{NO}]_2\text{HgBr}_4$ .

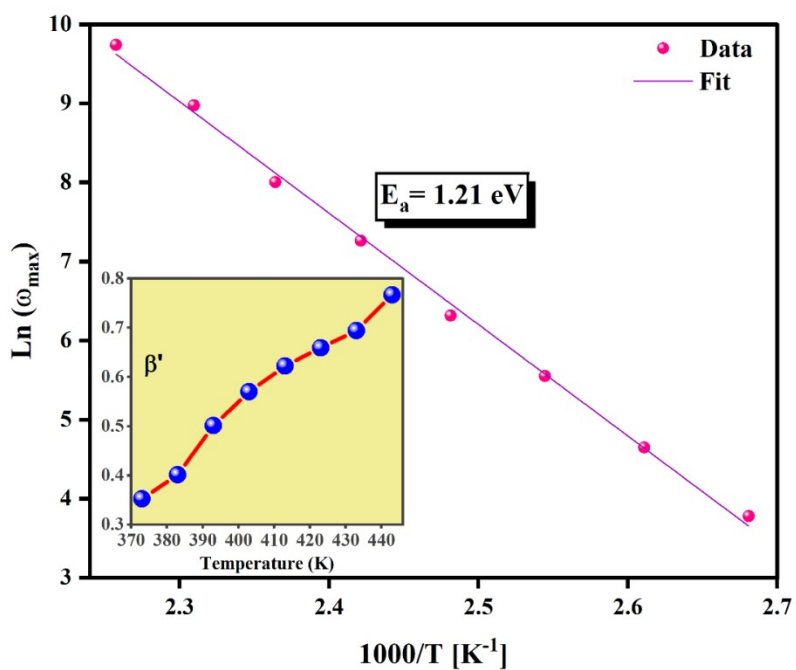

Figure S8: The variation of  $\text{Ln}(\omega_{max})$  versus  $1000/T$ . (inset: Temperature dependence of  $\beta'$  value)

**Table S1. Fractional atomic coordinates and equivalent isotropic temperature factors (Å<sup>2</sup>).**

| Atome | x          | y          | z          | $U_{eq}$   |
|-------|------------|------------|------------|------------|
| Hg1   | 0.50000    | 0.25764(1) | 0.64600(1) | 0.02288(4) |
| Br1   | 0.39316(1) | 0.17174(1) | 0.64602(2) | 0.02655(6) |
| Br2   | 0.50000    | 0.35170(2) | 0.48913(2) | 0.02194(7) |
| Br02  | 0.50000    | 0.35245(2) | 0.80651(2) | 0.02165(7) |
| N1    | 0.63189(9) | 0.26326(1) | 0.90983(1) | 0.02055(4) |
| C2    | 0.68157(1) | 0.32937(1) | 0.89396(1) | 0.01668(4) |
| C3    | 0.74428(1) | 0.30375(1) | 0.87978(2) | 0.01917(4) |
| C4    | 0.7915(1)  | 0.36711(1) | 0.86900(1) | 0.01835(4) |
| C5    | 0.77506(1) | 0.45514(1) | 0.87280(1) | 0.01602(4) |
| C6    | 0.71147(1) | 0.47875(1) | 0.88542(1) | 0.01827(4) |
| C7    | 0.66392(1) | 0.41645(1) | 0.89640(1) | 0.01910(4) |
| C8    | 0.82519(1) | 0.52506(1) | 0.86662(1) | 0.01772(4) |
| C10   | 0.89316(1) | 0.50129(1) | 0.84616(2) | 0.02334(4) |
| O9    | 0.80890(8) | 0.60105(9) | 0.88007(1) | 0.02588(3) |

**Table S2. Principal intermolecular distances (Å) and angles (°).**

|                      | Distances (Å) |                            | Angles (°) |
|----------------------|---------------|----------------------------|------------|
| Hg1-Br1              | 2.586(1)      | Br1 <sup>i</sup> -Hg1-Br1  | 118.69(1)  |
| Hg1-Br1 <sup>i</sup> | 2.586(2)      | Br2-Hg1-Br1                | 106.53(1)  |
| Hg1-Br2              | 2.589(1)      | Br1 <sup>i</sup> -Hg1-Br2  | 106.53(1)  |
| Hg1-Br02             | 2.637(1)      | Br1-Hg1-Br02               | 106.34(1)  |
| N1-C2                | 1.465(3)      | Br1 <sup>i</sup> -Hg1-Br02 | 106.34(1)  |
| C2-C7                | 1.387(3)      | Br2-Hg1-Br02               | 112.60(1)  |
| C2-C3                | 1.378(3)      | C7-C2-C3                   | 121.99(2)  |
| C3-C4                | 1.391(3)      | C7-C2-N1                   | 118.48(2)  |
| C4-C5                | 1.395(3)      | C3-C2-N1                   | 119.50(2)  |
| C5-C6                | 1.384(3)      | C4-C3-C2                   | 119.04(2)  |
| C5-C8                | 1.500(3)      | C3-C4-C5                   | 120.00(2)  |
| C6-C7                | 1.385(3)      | C4-C5-C6                   | 119.55(2)  |
| C8-O9                | 1.229(2)      | C4-C5-C8                   | 121.36(2)  |
| C8-C10               | 1.488(3)      | C6-C5-C8                   | 119.06(2)  |
|                      |               | C5-C6-C7                   | 121.13(2)  |
|                      |               | C2-C7-C6                   | 118.27(2)  |
|                      |               | O9-C8-C10                  | 121.57(2)  |
|                      |               | O9-C8-C5                   | 118.61(2)  |
|                      |               | C10-C8-C5                  | 119.81(2)  |

Symmetry code: <sup>i</sup> -x, y, z

**Table S3. Assignments of the most important observed bands in IR spectra of  $[\text{C}_8\text{H}_{10}\text{NO}]_2\text{HgBr}_4$  at room temperature.**

| <b><math>[\text{C}_8\text{H}_{10}\text{NO}]_2\text{ZnBr}_4</math> Attribution</b> |                                  |
|-----------------------------------------------------------------------------------|----------------------------------|
| <b>IR</b>                                                                         | <b>Attribution</b>               |
| 2968                                                                              | $\nu_{\text{as}}\text{CH}_3$     |
| 2852.93                                                                           | $\nu_{\text{s}}\text{CH}_3$      |
| 1660.89                                                                           | $\nu(\text{C}=\text{O})$         |
| 1619.35                                                                           | $\delta_{\text{as}} \text{NH}_3$ |
| 1618.29                                                                           | C=C stretching vibrations        |
| 1600.12                                                                           | C=C stretching vibrations        |
| 1571.91                                                                           | C=C stretching vibrations        |
| 1482.89                                                                           | C=C stretching vibrations        |
| 1414.16                                                                           | C=C stretching vibrations        |
| 1483.53                                                                           | $\delta_{\text{as}} \text{NH}_3$ |
| 1313.65                                                                           | C-H in-plane bending             |
| 1173.68                                                                           | C-H in-plane bending             |
| 963.97                                                                            | C-H out-of-plane bending         |
| 830                                                                               | C-H out-of-plane bending         |
| 1091.13                                                                           | $\rho(\text{NH}_3)$ .            |
| 634.15                                                                            | C-C-C in plane bending           |
| 572.73                                                                            | C-C-C in plane bending           |
| 463.34                                                                            | C-C-C out-of-plane bending       |



**Table S4. Electrical parameters obtained from the fit of Nyquist plots using the Zview software for  $[\text{C}_8\text{H}_{10}\text{NO}]_2\text{HgBr}_4$ .**

| <b>T(K)</b> | <b>R (<math>10^6 \cdot \Omega</math>)</b> | <b>C (<math>10^{-11} \cdot \text{F}</math>)</b> | <b>Q(<math>10^{-10} \cdot \text{F}</math>)</b> | <b><math>\alpha</math></b> |
|-------------|-------------------------------------------|-------------------------------------------------|------------------------------------------------|----------------------------|
| <b>373</b>  | 439                                       | 3.27                                            | 0.848                                          | 0.6821                     |
| <b>383</b>  | 306                                       | 3.28                                            | 1.18                                           | 0.65305                    |
| <b>393</b>  | 176                                       | 3.30                                            | 1.78                                           | 0.61743                    |
| <b>403</b>  | 91.80                                     | 3.32                                            | 3.22                                           | 0.56864                    |
| <b>413</b>  | 35.80                                     | 3.30                                            | 3.87                                           | 0.57336                    |
| <b>423</b>  | 14.30                                     | 3.29                                            | 5.04                                           | 0.56793                    |
| <b>433</b>  | 4.84                                      | 3.29                                            | 8.78                                           | 0.5442                     |
| <b>443</b>  | 1.17                                      | 3.26                                            | 7.18                                           | 0.59239                    |
